# Supplementary material for: A Low Tumor Mutational Burden and PTEN Mutations Are Predictors of a Negative Response to PD-1 Blockade in MSI-H/dMMR Gastrointestinal Tumors
Source: Oxford University Press journal article supplement (doi:10.1158/1078-0432.ccr-21-0401), 2021-04-29
Supplement: 10780432ccr210401-sup-259988_2_supp_7055618_qrn3kd.docx [file 10780432ccr210401-sup-259988_2_supp_7055618_qrn3kd.docx]

**Supplementary Table S1: Patient characteristics according to TMB status**

| **Characteristic** |  | **TMB-high n = 41** | **%** | **TMB-low n = 4** | **%** |
| --- | --- | --- | --- | --- | --- |
| **Age** | Median (range) | 63 | (30-84) | 73 | (68-79) |
|  | ≥65 | 20 | (48.8) | 4 | (100.0) |
| **Sex** | Male | 23 | (56.1) | 1 | (25.0) |
|  | Female | 18 | (43.9) | 3 | (75.0) |
| **ECOG PS** | 0 | 23 | (56.1) | 1 | (25.0) |
|  | 1 | 18 | (43.9) | 3 | (75.0) |
| **Previous treatment regimens** | 1 | 16 | (39.0) | 2 | (50.0) |
|  | ≥2 | 25 | (61.0) | 2 | (50.0) |
| **Primary cancer** | Gastric | 15 | (36.6) | 3 | (75.0) |
|  | Colorectal | 16 | (39.0) | 1 | (25.0) |
|  | Cholangiocarcinoma | 5 | (12.2) | 0 | (0.0) |
|  | Small intestine | 2 | (0.0) | 0 | (0.0) |
|  | Pancreatic | 2 | (4.9) | 0 | (0.0) |
|  | Duodenal | 1 | (2.4) | 0 | (0.0) |
| **Site of metastasis** | Liver | 8 | (19.5) | 1 | (25.0) |
|  | Lung | 6 | (14.6) | 1 | (25.0) |
|  | Lymph node | 33 | (80.5) | 2 | (50.0) |
|  | Peritoneum | 18 | (43.9) | 2 | (50.0) |
| **Number of metastatic organs** | 1 | 21 | (51.2) | 2 | (50.0) |
|  | ≥2 | 20 | (48.8) | 2 | (50.0) |

Abbreviations: ECOG, Eastern Cooperative Oncology Group; PS, performance status; TMB, tumor mutational burden
